# Supplementary material for: Exploring the Brønsted acidity of UiO-66 (Zr, Ce, Hf) metal–organic frameworks for efficient solketal synthesis from glycerol acetalization
Source: Royal Society of Chemistry journal article supplement (doi:10.1039/c8dt03512a), 2018-12-03
Supplement: c8dt03512a1.pdf [file c8dt03512a1.pdf]

## Electronic Supplementary Information

### **Exploring the Brønsted Acidity of UiO-66 (Zr, Ce, Hf) Metal-Organic Frameworks for Efficient Solketal Synthesis from Glycerol Acetalization**

Vasudeva Rao Bakuru,<sup>a,b#</sup> Sathyapal R. Churipard,<sup>a#</sup> Sanjeev P. Maradur,<sup>a</sup> and Suresh Babu Kalidindi<sup>a\*</sup>

<sup>a</sup> *Materials Science Division, Poornaprajna Institute of Scientific Research, Devanahalli, Bangalore Rural- 562164, India.*

<sup>b</sup> *Manipal Academy of Higher Education, Manipal-576104, India.*

\* To whom correspondence should be addressed. Email: [sureshk@poornaprajna.org](mailto:sureshk@poornaprajna.org) and [ksureshu@gmail.com](mailto:ksureshu@gmail.com)

## Table of Contents

|                                        |     |
|----------------------------------------|-----|
| 1. General information...              | 1-2 |
| 2. Synthesis methods.....              | 2-3 |
| 3. Characterization of catalysts ..... | 3-5 |
| 4. Catalysis... ..                     | 5-9 |
| 5. References... ..                    | 13  |

### 1. General information

#### 1.1. Reagents

Hafnium chloride ( $\text{HfCl}_4$ , 98%) was purchased from Sigma-Aldrich. Ammonium ceric nitrate ( $(\text{NH}_4)_2[\text{Ce}(\text{NO}_3)_6]$ , 98%), Acetic acid ( $\text{CH}_3\text{COOH}$ , 98.5-100.5%), Acetone ( $\text{C}_3\text{H}_6\text{O}$ , 99%), Methanol ( $\text{CH}_4\text{O}$ , 99%), 1, 4-benzenedicarboxylate ( $\text{H}_2\text{BDC}$ , 98%) and hydrochloric acid ( $\text{HCl}$ , 98%) were brought from SDFCL, Mumbai, India. Zirconium Chloride ( $\text{ZrCl}_4$ , 98%), Glycerol (98%), Sodium hydroxide ( $\text{NaOH}$ , 99%) and Potassium bromide ( $\text{KBr}$ , 98.5%) were purchased from Merck Life Science Pvt. Ltd. Mumbai, India. *N, N*-dimethylformamide (DMF, 99 wt %) was supplied by Avra Synthesis Pvt. Ltd. Hyderabad, India. Ethanol ( $\text{C}_2\text{H}_6\text{O}$ , 99.9%) was supplied by Fine Chemical Co. Ltd. Sodium nitrate ( $\text{NaNO}_3$ , 99%) purchased from NICE chemicals, India. All chemicals were used without further purification.

#### 1.2. Characterization

Powder X-ray diffraction (PXRD) patterns were recorded on Bruker with  $\text{Cu K}\alpha$  radiation ( $\lambda = 1.5418 \text{ \AA}$ ) operating at 20 kV and 10 mA. The specific surface area, pore volume and pore size of catalysts were measured using a BEL Sorp II BET (Brunauer-Emmett-Teller) instrument.

### 2. Synthesis methods

#### 2.1. Synthesis of UiO-66(Hf) MOF

In a typical solvothermal synthesis, 300 mg (0.94 mmol) of  $\text{HfCl}_4 \cdot 6\text{H}_2\text{O}$  and 174 mg (1.04 mmol) of  $\text{H}_2\text{BDC}$  were dissolved in 10 mL of DMF solvent containing 0.1M  $\text{H}_2\text{O}$  in a 30 mL screw capped bottle and sealed. The synthesis was carried out in a pre-heated oven at  $100^\circ\text{C}$  for 24 h. On completion of the reaction time, the reaction mixture was brought to room temperature and the supernatant was decanted. The solid product was washed with fresh DMF (50 mL) once,

twice with ethanol (2 x 50 mL) using centrifuge. Finally, the powder was dried under vacuum at room temperature.

## 2.2. Synthesis of UiO-66(Zr) MOF

In a typical procedure, UiO-66(Zr) material synthesized according reported literature.<sup>2</sup> 50 mg of H<sub>2</sub>BDC (0.31 mmol), 66.8 mg of ZrCl<sub>4</sub> (0.28 mmol) and 1.4 mL of acetic acid were dissolved in 20 mL of DMF solvent in a 30 mL screw capped bottle. It is sonicated for 10 minutes for complete dissolution and placed in preheated oven at 120 °C for 24 hours. After the completion of reaction time, the mixture was brought to room temperature, centrifuged and the supernatant was decanted. The product was first washed with DMF and then with methanol twice (2 x 15 mL). It was then dried under vacuum at room temperature.

## 2.3. Synthesis of UiO-66(Ce) MOF

In a typical procedure, UiO-66(Ce) material synthesized according reported literature.<sup>3</sup> 212.4 mg terephthalic acid (1.279 mmol) was dissolved in approximately 7.2 mL of DMF. The solute was dissolved by sonicating for 5 mins. Exactly 2.4 mL of 0.533M [Ce(NH<sub>4</sub>)<sub>2</sub>(NO<sub>3</sub>)<sub>6</sub>] was added using a micropipette. It is then kept in an oil bath at 100°C and stirred for 15 min using a magnetic stirrer. Yellow colored precipitate was formed. After the completion of reaction time, the mixture was brought to room temperature, centrifuged and the supernatant was decanted. Washed two times using fresh DMF (7mL) followed by washing with acetone 3 times.

## 3. Characterization of catalysts

### 3.1. Scanning electron microscopy (SEM) analysis of MOFs

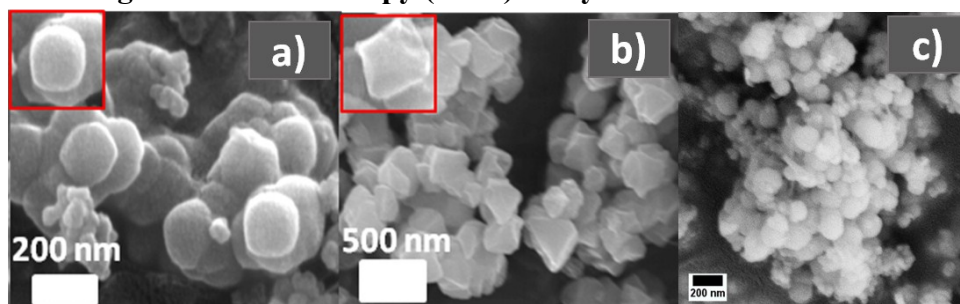

**Figure S1:** Scanning electron microscopy images of a) UiO-66(Zr), b) UiO-66(Ce) and c) UiO-66(Hf). The morphology and size distribution of UiO-66(Zr), UiO-66(Ce) and UiO-66(Hf), MOFs are nearly spherical, 50-200 nm; deformed octahedral, 100-270 nm; nearly spherical 50-220 nm, respectively.

### 3.2 Estimation of acidity of MOFs

In a typical procedure, 100 mg of catalyst (MOF) was stirred with 10 ml 0.2 M NaNO<sub>3</sub> solution for 8 h to undergo ion exchange at room temperature. Then the mixture was centrifuged to separate the catalyst and ion-exchanged solution. Later, the liberated HCl was titrated against

0.0025 M NaOH using phenolphthalein as an indicator.<sup>4</sup> The total H<sup>+</sup> ions liberated was calculated and tabulated in the Table S1.

| Catalyst    | Acidity (mmol/g) |
|-------------|------------------|
| UiO-66 (Hf) | 1.26             |
| UiO-66 (Ce) | 0.82             |
| UiO-66 (Zr) | 0.25             |

**Table S1:** Total H<sup>+</sup> calculation using acid-base titration.

### 3.3 Potentiometric titration to calculate the linker defects and strength of acidity in each isostructural UiO-66 MOFs

The linker defects of three UiO-66 MOFs have been calculated by ion exchange followed by acid-base pH titration.<sup>5</sup> In a typical procedure, 50 mg of catalyst (MOF) was soaked in 60 mL of 0.01M NaNO<sub>3</sub> solution and kept it for stirring for 18 h to undergo ion exchange at room temperature. The pH of the each ion exchanged MOF solution is measured before the titration and values were noted as 3.5, 4.6 and 5.8 for UiO-66(Hf), UiO-66(Ce) and UiO-66 (Zr) respectively, using pH electrode (EUTECH PC510). In the next step, each titrant pH value adjusted to 3 by adding 0.1M aq. HCl. Finally, it was titrated against 0.1 M aq. NaOH by adding dropwise (0.05mL) until pH become 11. The low pH of UiO-66(Hf) however suggests high acidity among other MOFs. This low pH/high acidity of UiO-66(Hf) might be due to more oxophilic nature of Hf (IV) metal ion leads to labile nature of proton at SBU in the ion exchange method. Results suggest that UiO-66(Hf) had shown more acidic nature than UiO-66(Ce) and UiO-66(Zr). Moreover, the Brønsted acidity arising from SBU /metal node associated with  $\mu_3$ -OH, M-OH<sub>2</sub> and M-OH are in well accordance with the literature reports.<sup>5, 6, 7</sup> On the other hand, their M-O bond dissociation energies are to be 801 kJ/mol, 790 kJ/mol, and 766 kJ/mol of UiO-66(Hf), UiO-66(Ce) and UiO-66(Zr), respectively, suggests that Hf(IV) has more oxophilic nature among others.

**Table S2:** Calculated pKa values for isostructural UiO-66 MOFs

| MOF         | pH(before titration) | pKa1        | pKa2             | pKa3 |
|-------------|----------------------|-------------|------------------|------|
|             |                      | $\mu_3$ -OH | -OH <sub>2</sub> | -OH  |
| UiO-66 (Hf) | 3.51                 | 3.30        | 4.94             | 6.25 |
| UiO-66 (Ce) | 4.57                 | 3.44        | 4.93             | 7.30 |
| UiO-66 (Zr) | 5.81                 | 3.68        | 5.75             | 7.43 |

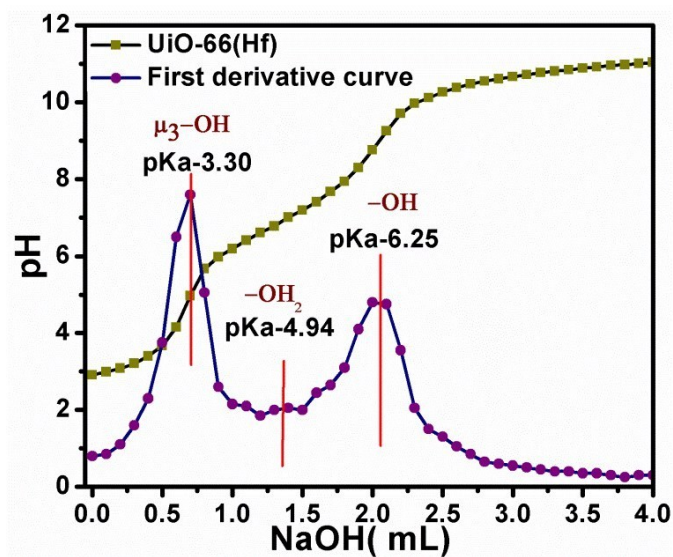

**Figure S2.** Acid-base titration curve and first derivative curve for UiO-66(Hf).

|                           |                 |                                       |
|---------------------------|-----------------|---------------------------------------|
| $\mu_3\text{-OH}$         | 0.5996 mL       | mL NaOH                               |
|                           | 0.05996 mmol    | mmol protons from $\mu_3\text{-OH}$   |
| <b>Hf -OH<sub>2</sub></b> | 0.7972 mL       | mL NaOH                               |
| EP2-EP1                   | 0.07972 mmol    | mmol protons from Hf -OH <sub>2</sub> |
| <b>Hf -OH</b>             | 0.6596 mL       | mL NaOH                               |
| EP3-EP2                   | 0.06596 mmol    | mmol protons from Hf -OH              |
|                           | <b>0.145270</b> | <b>Total mmol of protons</b>          |

**Table S3:** Calculation of linker defects in UiO-66 (Hf) MOF.

| Missing linkers | Molecular formula                                                                                           | M.Wt.   | mmol of taken for 0.0510g | Acidity (moles) | Acidity (mmol) for 0.050 g |
|-----------------|-------------------------------------------------------------------------------------------------------------|---------|---------------------------|-----------------|----------------------------|
| 0               | Hf <sub>6</sub> O <sub>4</sub> (OH) <sub>4</sub> (BDC) <sub>6</sub>                                         | 2200.74 | 2.3174E-05                | 0               | 0                          |
| 1               | Hf <sub>6</sub> O <sub>4</sub> (OH) <sub>4</sub> (BDC) <sub>5</sub> [H <sub>2</sub> O(OH)] <sub>2</sub>     | 2106.41 | 2.42118E-05               | 0.0001452       | 0.145270                   |
| 1.05            | Hf <sub>6</sub> O <sub>4</sub> (OH) <sub>4</sub> (BDC) <sub>5</sub> [H <sub>2</sub> O(OH)] <sub>2</sub>     | 2099.94 | 2.42864E-05               | 0.00015300      | 0.15300                    |
| 1.1             | Hf <sub>6</sub> O <sub>4</sub> (OH) <sub>4</sub> (BDC) <sub>4.9</sub> [H <sub>2</sub> O(OH)] <sub>2.1</sub> | 2093.47 | 2.43614E-05               | 0.00016078      | 0.16078                    |
| 1.2             | Hf <sub>6</sub> O <sub>4</sub> (OH) <sub>4</sub> (BDC) <sub>4.8</sub> [H <sub>2</sub> O(OH)] <sub>2.2</sub> | 2080.54 | 2.45128E-05               | 0.00017649      | 0.17649                    |
| 1.3             | Hf <sub>6</sub> O <sub>4</sub> (OH) <sub>4</sub> (BDC) <sub>4.7</sub> [H <sub>2</sub> O(OH)] <sub>2.3</sub> | 2067.61 | 2.46661E-05               | 0.00019239      | 0.19239                    |
| 1.4             | Hf <sub>6</sub> O <sub>4</sub> (OH) <sub>4</sub> (BDC) <sub>4.6</sub> [H <sub>2</sub> O(OH)] <sub>2.4</sub> | 2054.67 | 2.48214E-05               | 0.00020850      | 0.20849                    |
| 1.5             | Hf <sub>6</sub> O <sub>4</sub> (OH) <sub>4</sub> (BDC) <sub>4.5</sub> [H <sub>2</sub> O(OH)] <sub>2.5</sub> | 2041.74 | 2.49786E-05               | 0.00022480      | 0.22480                    |

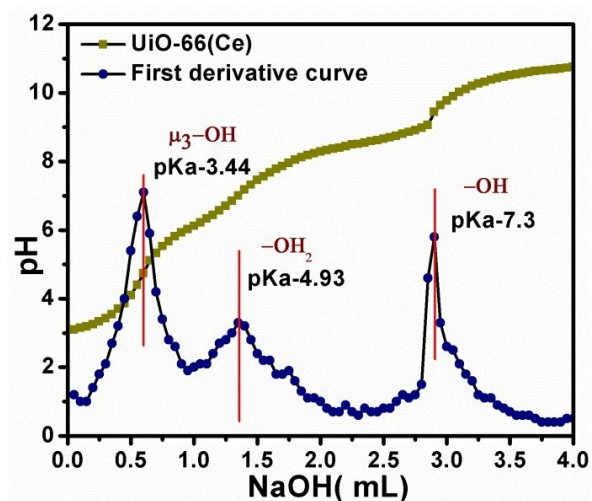

Figure S3. Acid-base titration curve and first derivative curve for UiO-66(Ce).

|                     |                 |                                      |
|---------------------|-----------------|--------------------------------------|
| $\mu_3$ -OH         | 0.6015mL        | mL NaOH                              |
|                     | 0.06015mmol     | mmol protons from $\mu_3$ -OH        |
| Ce -OH <sub>2</sub> | 0.75064 mL      | mL NaOH                              |
| EP2-EP1             | 0.075064        | mmol protons from Ce-OH <sub>2</sub> |
| Ce -OH              | 1.55065 mL      | mL NaOH                              |
| EP3-EP2             | 0.155064        | mmol protons from Ce-OH              |
|                     | <b>0.230128</b> | <b>Total mmol of protons</b>         |

Table S4: Calculation of linker defects in UiO-66 (Ce) MOF.

| Missing linkers | Molecular formula                                                                                           | M.Wt    | mmol of taken for 0.050g | Acidity (moles) | Acidity (mmol) for 0.050 g |
|-----------------|-------------------------------------------------------------------------------------------------------------|---------|--------------------------|-----------------|----------------------------|
| 0               | Ce <sub>6</sub> O <sub>4</sub> (OH) <sub>4</sub> (BDC) <sub>6</sub>                                         | 1969.92 | 2.53817E-05              | <b>0</b>        | <b>0</b>                   |
| 1               | Ce <sub>6</sub> O <sub>4</sub> (OH) <sub>4</sub> (BDC) <sub>5</sub> [H <sub>2</sub> O(OH)] <sub>2</sub>     | 1875.59 | 2.66582E-05              | 0.00015994      | 0.15994                    |
| 1.1             | Ce <sub>6</sub> O <sub>4</sub> (OH) <sub>4</sub> (BDC) <sub>4.9</sub> [H <sub>2</sub> O(OH)] <sub>2.1</sub> | 1862.66 | 2.68433E-05              | 0.00017716      | 0.17716                    |
| 1.2             | Ce <sub>6</sub> O <sub>4</sub> (OH) <sub>4</sub> (BDC) <sub>4.8</sub> [H <sub>2</sub> O(OH)] <sub>2.2</sub> | 1849.73 | 2.70310E-05              | 0.00019462      | 0.19462                    |
| 1.3             | Ce <sub>6</sub> O <sub>4</sub> (OH) <sub>4</sub> (BDC) <sub>4.7</sub> [H <sub>2</sub> O(OH)] <sub>2.3</sub> | 1836.79 | 2.72213E-05              | 0.00021232      | 0.21232                    |
| 1.4             | Ce <sub>6</sub> O <sub>4</sub> (OH) <sub>4</sub> (BDC) <sub>4.6</sub> [H <sub>2</sub> O(OH)] <sub>2.4</sub> | 1823.86 | 2.74143E-05              | 0.00023028      | 0.23028                    |
| 1.5             | Ce <sub>6</sub> O <sub>4</sub> (OH) <sub>4</sub> (BDC) <sub>4.5</sub> [H <sub>2</sub> O(OH)] <sub>2.5</sub> | 1810.93 | 2.76101E-05              | 0.00024849      | 0.24849                    |

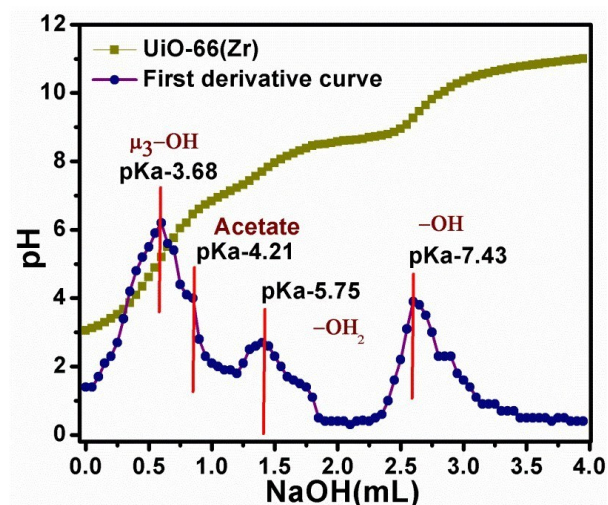

Figure S4. Acid-base titration curve and first derivative curve for UiO-66(Zr)

|                                    |             |                                      |
|------------------------------------|-------------|--------------------------------------|
| $\mu_3$ -OH                        | 0.589mL     | mL NaOH                              |
|                                    | 0.0589 mmol | mmol protons from $\mu_3$ -OH        |
| Acetate                            | 0.309       | mL NaOH                              |
| EP <sub>2</sub> -EP <sub>1</sub> = | 0.0309      | mmol protons from AA                 |
| Zr -OH <sub>2</sub>                | 1.198       | mL NaOH                              |
| EP <sub>3</sub> -EP <sub>2</sub> = | 0.1198      | mmol protons from Zr OH <sub>2</sub> |
| Zr -OH                             | 1.648       | mL NaOH                              |
| EP <sub>4</sub> -EP <sub>3</sub> = | 0.1648      | mmol protons from Zr-OH              |

|                                                            |         |
|------------------------------------------------------------|---------|
| Total mmol of protons from AA and [(OH <sub>2</sub> )(OH)] | 0.3155  |
| Amount of [(OH <sub>2</sub> )(OH)] protons                 | 0.2846  |
| Relative amount from AA                                    | 9.47 %  |
| Relative amount of [(OH <sub>2</sub> )(OH)]                | 90.20 % |

Table S5: Calculation of linker defects in UiO-66 Zr MOF.

| No. of missing linkers | Total number of BDC linkers | MW (g/Mol) | Protons from AA | Protons from OH/OH <sub>2</sub> | Amount of protons from 0.05 g sample (mmoles) |
|------------------------|-----------------------------|------------|-----------------|---------------------------------|-----------------------------------------------|
| 0                      | 6                           | 1664.03    | 0               | 0                               | 0                                             |
| 1                      | 5                           | 1580.25    | 0.19587         | 5.4123                          | 0.19606                                       |
| 1.1                    | 4.9                         | 1571.88    | 0.21546         | 5.9535                          | 0.21567                                       |
| 1.2                    | 4.8                         | 1563.50    | 0.23505         | 6.4948                          | 0.23528                                       |
| 1.3                    | 4.7                         | 1555.12    | 0.25464         | 7.0360                          | 0.25489                                       |
| 1.4                    | 4.6                         | 1546.74    | 0.27423         | 7.5773                          | 0.27450                                       |
| 1.5                    | 4.5                         | 1538.36    | 0.29381         | 8.1185                          | 0.29410                                       |
| 1.6                    | 4.4                         | 1529.98    | 0.31340         | 8.6597                          | 0.31371                                       |
| 1.7                    | 4.3                         | 1521.60    | 0.33299         | 9.2010                          | 0.33332                                       |

#### 4. Catalysis

**Table S6:** Esterification of levulinic acid with methanol and ethanol with different MOFs.

| Catalyst   | Reaction condition |       | LA:MeOH<br>mole ratio | Levulinic<br>acid<br>(LA)con.(%) | LA:EtOH<br>mole ratio | Levulinic<br>acid con.(%) |
|------------|--------------------|-------|-----------------------|----------------------------------|-----------------------|---------------------------|
|            | Time               | Temp. |                       |                                  |                       |                           |
| UiO-66(Hf) | 4h                 | 80°C  | 1 : 15                | 84.1                             | 1 : 15                | 44.5                      |
| UiO-66(Ce) | 4h                 | 80°C  | 1 : 15                | 50.4                             | 1 : 15                | 18.8                      |
| UiO-66(Zr) | 4h                 | 80°C  | 1 : 15                | 15.7                             | 1 : 15                | 7.5                       |
| Blank      | 4h                 | 80°C  | 1 : 15                | 8.3                              | 1 : 15                | 4.2                       |

**Reaction conditions:** Levulinic acid (116.12 mg, 1 mmol), alcohol (480.6 mg, 15 mmol), catalyst amount 20 mg and reaction carried for 4h at 80°C. Products were analyzed by Agilent-GC (HP-5 column).

#### 4.1. Solketal synthesis from glycerol and acetone with different MOFs

In a typical catalysis procedure, 1g of glycerol and 2.52 g of acetone( glycerol to acetone mole ratio to be 1:4) were transferred into 25 mL of round bottom flask and then 10 wt% of catalyst (with respect to glycerol weight) was transferred into reactants mixture. Finally reaction carried at room temperature for 1h under stirring. On completion of reaction time, small amount of methanol was added to the reaction mixture and the product mixture was then separated from catalyst by centrifuge. The product identification was analyzed by gas chromatography (GC-2014, Shimadzu, column: DB-WAX, 30 m × 0.25 mm × 0.25 μm).

**Table S7:** Turnover frequency (TOF) values comparison for different catalysts.

| Catalyst                                        | Glycerol<br>conversion (%) | Reaction conditions |               | TOF(h <sup>-1</sup> )* | Ref.                 |
|-------------------------------------------------|----------------------------|---------------------|---------------|------------------------|----------------------|
|                                                 |                            | Temp.(C)            | Time<br>(min) |                        |                      |
| <b>UiO-66(Hf)<sup>(a)</sup></b>                 | <b>48.4</b>                | <b>R.T</b>          | <b>5</b>      | <b>13886.9</b>         | <b>This work (a)</b> |
| UiO-66(Zr)                                      | 0.7                        | R.T                 | 5             | 153.0                  | This work            |
| UiO-66(Ce)                                      | 14.4                       | R.T                 | 5             | 3801.0                 | This work            |
| A-15 <sup>[b]</sup>                             | 15.0                       | R.T                 | 30            | 689                    | 8                    |
| MoO <sub>3</sub> /SiO <sub>2</sub> 0.5          | 0.5                        | R.T                 | 30            | 68                     | 8                    |
| K-10                                            | 1.2                        | R.T                 | 30            | 236                    | 8                    |
| H-ZSM-5                                         | 1.0                        | R.T                 | 30            | 108                    | 8                    |
| H-Beta                                          | 11.5                       | R.T                 | 30            | 1656                   | 8                    |
| MP-SO <sub>3</sub> H-24                         | 60.5                       | R.T                 | 30            | 5682                   | 8                    |
| SO <sub>4</sub> <sup>2-</sup> /ZrO <sub>2</sub> | 3.5                        | R.T                 | 30            | 687                    | 8                    |
| Meso-SnO <sub>2</sub> -T-350 <sup>(c)</sup>     | 51.3                       | 60 °C               | 30            | 506                    | 9                    |



|                                                                                  |      |        |     |      |    |
|----------------------------------------------------------------------------------|------|--------|-----|------|----|
| Meso-SnO <sub>2</sub> -TF-350 <sup>(c)</sup>                                     | 29.0 | 60 °C  | 30  | 420  | 9  |
| Al-MCM-41 <sup>(c)</sup>                                                         | 35.5 | 60 °C  | 30  | 154  | 9  |
| Al-SBA-15 <sup>(c)</sup>                                                         | 26.1 | 60 °C  | 30  | 142  | 9  |
| Al-TUD-1 <sup>(c)</sup>                                                          | 10.2 | 60 °C  | 30  | 45   | 9  |
| Zr-TUD-1 <sup>(d)</sup>                                                          | 46   | 80 °C  | 120 | 339  | 10 |
| Hf-TUD-1 <sup>(d)</sup>                                                          | 52   | 80 °C  | 120 | 320  | 10 |
| Al-TUD-1 <sup>(d)</sup>                                                          | 28   | 80 °C  | 120 | 105  | 10 |
| Sn-MCM-41 <sup>(d)</sup>                                                         | 42   | 80 °C  | 120 | 319  | 10 |
| USY <sup>(d)</sup>                                                               | 36   | 80 °C  | 120 | 54   | 10 |
| Nb <sub>2</sub> O <sub>5</sub> -573 <sup>(e)</sup>                               | 73   | 70 °C  | 120 | 480  | 11 |
| AC-S-18M <sup>(f)</sup>                                                          | 36   | RT     | 30  | 153  | 12 |
| SCS1/0.3 <sup>(g)</sup>                                                          | 76   | 70 °C  | 30  | 39   | 13 |
| BAIL-1 <sup>(h)</sup>                                                            | 63   | R.T    | 30  | 661  | 14 |
| SnCl <sub>2</sub> <sup>[i]</sup>                                                 | 81   | 25° C  | 90  | 59.7 | 15 |
| H <sub>2</sub> SO <sub>4</sub> <sup>[i]</sup>                                    | 51   | 25° C  | 90  | 33.9 | 15 |
| PTSA <sup>[i]</sup>                                                              | 65   | 25° C  | 90  | 39.3 | 15 |
| MIL -100(V) <sup>[j]</sup>                                                       | 83   | 25° C  | 90  | 70.7 | 16 |
| Co[II](Co[III] <sub>1.25</sub> Al <sub>0.75</sub> )O <sub>4</sub> <sup>[k]</sup> | 69.2 | 130 °C | 180 | 139  | 17 |
| V-MCM-41                                                                         | 84   | -      | -   | 10.2 | 18 |

<sup>[a]</sup>**Reaction conditions:** Glycerol = 2.0 g, Acetone = 5.04g, glycerol: acetone = 1:4, catalyst = 0.25wt% (referred to glycerol weight).

<sup>[b]</sup>**Reaction conditions:** Glycerol = 2.5g, Acetone = 1.6g, Glycerol: acetone = 1:1, catalyst =0.1wt% (referred to glycerol weight).

<sup>[c]</sup>**Reaction conditions:** glycerol (27 mmol = 2.5 g), acetone (27 mmol = 1.6 g), catalyst amount = 0.125g, temp = 60 °C, time = 30 min.

<sup>[d]</sup>**Reaction conditions:** 1.00 × 10<sup>-2</sup> mol of glycerol, 1.00 × 10<sup>-2</sup> mol of acetone (acetone :glycerol = 1 : 1), 1.50 × 10<sup>-3</sup> mol of dioxane and 2.00× 10<sup>-2</sup> mol of tert-butanol, 25 mg of catalyst (3 wt% relative to glycerol), 2 h at 80 °C.

<sup>[e]</sup>**Reaction conditions:** Temperature = 343 K, glycerol: acetone =1:1.5, Catalyst = 6.4 wt% (wrt glycerol), Solvent free

<sup>[f]</sup>**Reaction conditions:** Temperature = room temperature, glycerol: acetone =1: 4, Catalyst = 2.7 wt%.

<sup>[g]</sup>**Reaction conditions:** Glycerol = 5 g, acetone = 18.91, Glycerol: acetone = 1:6 , Temperature = 70 °C

<sup>[h]</sup>**Reaction conditions:** Glycerol: acetone = 1:3, Temperature = R.T, Catalyst = 0.4 wt% (w.r.t glycerol)

<sup>[i]</sup>**Reaction conditions:** 4.79 mmol of glycerol and 19.64 mmol of acetone, 1 mol % of catalyst in 15 ml of CH<sub>3</sub>CN, 25°C, 90 min

<sup>[j]</sup>**Reaction conditions:** 4.79 mmol of glycerol and 19.64 mmol of acetone, 2.5wt % of catalyst in 15 ml of CH<sub>3</sub>CN, 25°C, 90 min

<sup>[k]</sup>**Reaction condition:** 2 g glycerol, 12.72 g acetone, 0.1 g catalyst, 130 °C, 3 h

TOF (h<sup>-1</sup>) = Moles of reactant / (Total no. of active sites in catalyst × Time in hour)

## 4.2. Controlled experiments

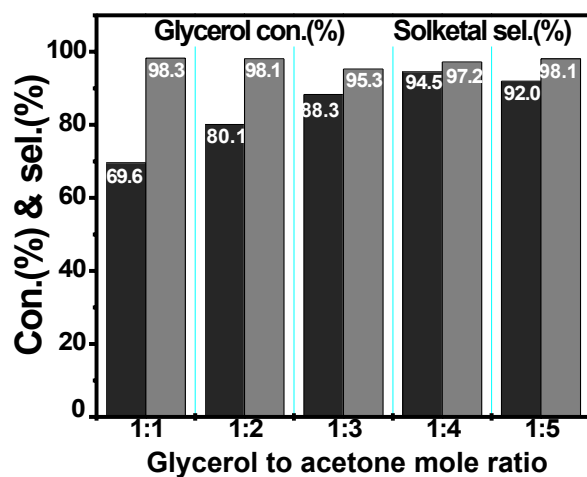

**Figure S5:** Effect of reactants molar ratio on solketal synthesis over UiO-66(Hf). Reaction conditions: Glycerol = 1.0 g, Acetone = 2.52g, Glycerol, catalyst = 10.0 wt% (referred to glycerol weight), reaction carried at R.T for 1h.

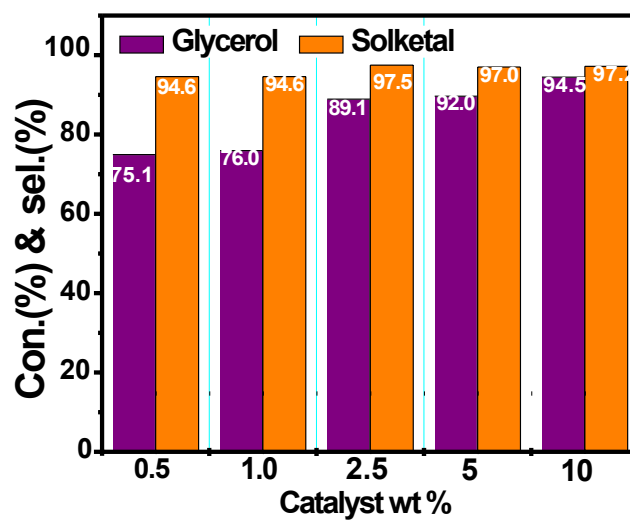

**Figure S6:** Effect of catalyst weight % on solketal synthesis over UiO-66(Hf). Reaction conditions: Glycerol = 1.0 g, Acetone = 2.52g, Glycerol: acetone = 1:4, catalyst = 0.5 wt%, 1.0 wt%, 2.5 wt% and 10.0 wt% (referred to glycerol weight), reaction carried at R.T for 1h.

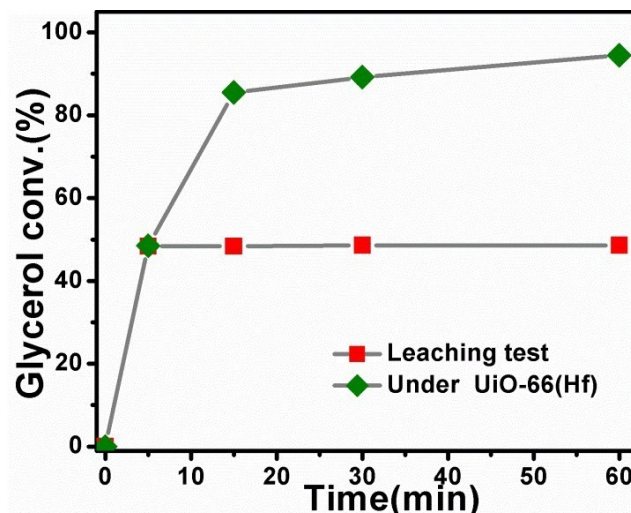

**Figure S7:** Catalyst heterogeneity (leaching) test for solketal synthesis over UiO-66(Hf). Reaction conditions: Glycerol = 1.0 g, Acetone = 2.52g, Glycerol: acetone = 1:4, catalyst = 10 wt% (referred to glycerol weight), reaction carried at R.T for 1h.

#### 4.3. Leaching test

Leaching test was carried out in order to test the catalysts heterogeneity. In a typical procedure, glycerol and acetone has taken as 1:4 mole ratios and transferred into 25 mL of round bottom flask and then 10 wt% of catalyst was added into the reactants mixture. And reaction carried at room temperature under stirring for 5 minutes and after completion of reaction the product mixture was isolated from catalyst. The isolated product mixture was carried for reaction without catalyst and reaction samples were collected for 15, 30 min and 1h. Finally, products identification analyzed by gas chromatograms.

#### 4.4. Recyclability of the catalyst

On completion of reaction, the catalyst was isolated from the reaction mixture using centrifugation. Then, initially the catalyst washed twice with water and four times with methanol in order to remove residuals of reactants/products from the active sites of catalyst. Finally, the catalyst was dried under vacuum at room temperature. The dried catalyst was used for 1<sup>st</sup> cycle for catalysis by following same procedure of fresh catalyst. And the same procedure followed for all cycles.

#### 4.5. ICP analyses after catalytic reactions

The reaction mixtures were filtered through 0.2  $\mu$  syringe filters after completion of reactions. The isolated reaction supernatants were analysed by ICP-OES analysis for Hf, Ce, and Zr metal ions in the respective solutions. We did not observe any detectable amounts (<1 ppm) of these metal ions which confirms that these MOF catalysts were highly stable and the reactions were heterogeneous in nature.

#### 4.7. MOF pore size comparison with the sizes of substrates

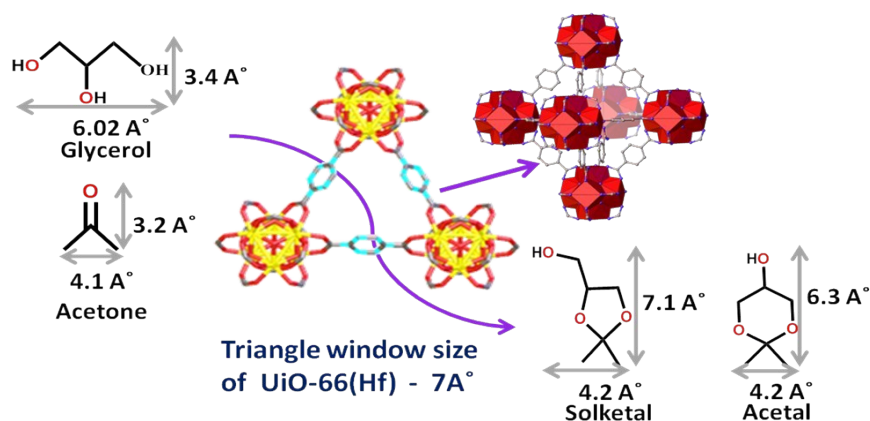

**Scheme S1:** Scheme: Comparison of molecular dimensions of substrates and products with window openings of UiO-66 MOFs in the glycerol acetalization. UiO-66 family of MOFs have tetrahedral (7.5 Å) and octahedral pores (12 Å) with window openings of ~7 Å. In comparison, the substrates glycerol and acetone dimensions are around 3.4 Å X 6.0 Å and 3.2 Å X 4.1 Å respectively. So, the substrates can enter the pores of UiO-66 quite easily. The product dimensions are also well within the sizes of pore/window openings.

## 5. References

1. S. Jakobsen, D. Gianolio, D. S. Wragg, M. H. Nilsen, H. Emerich, S. Bordiga, C. Lamberti, U. Olsbye, M. Tilset and K. P. Lillerud, *Physical Review B*, 2012, **86**, 125429.
2. K. Na, K. M. Choi, O. M. Yaghi and G. A. Somorjai, *Nano letters*, 2014, **14**, 5979-5983.
3. M. Lammert, M. T. Wharmby, S. Smolders, B. Bueken, A. Lieb, K. A. Lomachenko, D. De Vos and N. Stock, *Chemical Communications*, 2015, **51**, 12578-12581.
4. P. Manjunathan, M. Kumar, S. R. Churipard, S. Sivasankaran, G. V. Shanbhag and S. P. Maradur, *RSC Advances*, 2016, **6**, 82654-82660.
5. R. C. Klet, Y. Liu, T. C. Wang, J. T. Hupp and O. K. Farha, *Journal of Materials Chemistry A*, 2016, **4**, 1479-1485.
6. Y. Liu, R. C. Klet, J. T. Hupp and O. Farha, *Chemical Communications*, 2016, **52**, 7806-7809.
7. M. R. DeStefano, T. Islamoglu, S. J. Garibay, J. T. Hupp and O. K. Farha, *Chemistry of Materials*, 2017, **29**, 1357-1361.
8. S. R. Churipard, P. Manjunathan, P. Chandra, G. V. Shanbhag, R. Ravishankar, P. V. Rao, G. S. Ganesh, A. Halgeri and S. P. Maradur, *New Journal of Chemistry*, 2017, **41**, 5745-5751.
9. P. Manjunathan, V. S. Marakatti, P. Chandra, A. B. Kulal, S. B. Umbarkar, R. Ravishankar and G. V. Shanbhag, *Catalysis Today*, 2018, **309**, 61-76.
10. L. Li, T. I. Korányi, B. F. Sels and P. P. Pescarmona, *Green Chemistry*, 2012, **14**, 1611-1619.
11. G. Nair, E. Adrijanto, A. Alsalme, I. Kozhevnikov, D. Cooke, D. Brown and N. Shiju, *Catalysis Science & Technology*, 2012, **2**, 1173-1179.
12. R. Rodrigues, M. Gonçalves, D. Mandelli, P. P. Pescarmona and W. A. Carvalho, *Catalysis Science & Technology*, 2014, **4**, 2293-2301.
13. D. Nandan, P. Sreenivasulu, L. S. Konathala, M. Kumar and N. Viswanadham, *Microporous and Mesoporous Materials*, 2013, **179**, 182-190.
14. Z. Gui, N. Zahrtmann, S. Saravanamurugan, I. Reyero, Z. Qi, M. A. Bañares, A. Riisager and E. J. Garcia-Suarez, *ChemistrySelect*, 2016, **1**, 5869-5873.

15. F. D. Menezes, M. D. Guimaraes and M. r. J. da Silva, *Industrial & Engineering Chemistry Research*, 2013, **52**, 16709-16713.
16. M. N. Timofeeva, V. N. Panchenko, N. A. Khan, Z. Hasan, I. P. Prosvirin, S. V. Tsybulya and S. H. Jung, *Applied Catalysis A: General*, 2017, **529**, 167-174.
17. X. Li, L. Zheng and Z. Hou, *Fuel*, 2018, **233**, 565-571.
18. T. H. Abreu, C. I. Meyer, C. Padró and L. Martins, *Microporous and Mesoporous Materials*, 2019, **273**, 219-225.
